# Supplementary material for: Proximate Composition, Bioactive Compounds, and Antioxidant Potential of Wild Halophytes Grown in Coastal Salt Marsh Habitats
Source: MDPI journal article supplement (doi:10.3390/molecules27010028), 2021-12-22
Supplement: s1 [file s1]

## Article

# Proximate Composition, Bioactive Compounds, and Antioxidant Potential of Wild Halophytes Grown in Coastal Salt Marsh Habitats

Yasser A. El-Amier <sup>1,\*</sup>, Walid Soufan <sup>2</sup>, Khalid F. Almutairi <sup>2</sup>, Nouf S. Zaghloul <sup>3</sup> and Ahmed M. Abd-ElGawad <sup>1,2,\*</sup>

<sup>1</sup> Department of Botany, Faculty of Science, Mansoura University, Mansoura 35516, Egypt

<sup>2</sup> Plant Production Department, College of Food & Agriculture Sciences, King Saud University, P.O. Box 2460 Riyadh 11451, Saudi Arabia; wsoufan@ksu.edu.sa (W.S.); almutairik@ksu.edu.sa (K.F.A.)

<sup>3</sup> Bristol Centre for Functional Nanomaterials, HH Wills Physics Laboratory, Tyndall Avenue, Bristol, BS8 1FD, UK; nouf.zaghloul@bristol.ac.uk

\* Correspondence: yasran@mans.edu.eg (Y.A.E.-A.); aibrahim2@ksu.edu.sa (A.M.A.-E.); Tel.: 00201017229120 (Y.A.E.-A.); 00966562680864 (A.M.A.-E.)

## Supplementary Materials

**Table S1.** Soil analysis of the representative habitats supporting the growth of the studied halophytes along the Deltaic Mediterranean coastal desert, Egypt.

| Soil variables                            | <i>A. macrostachyum</i><br>(n=9) | <i>H. strobilaceum</i><br>(n=7) | <i>L. monoptalum</i><br>(n=4) | <i>L. pruinsum</i><br>(n=4) | <i>T. nilotica</i><br>(n=8) | LSD <sub>0.05</sub> |
|-------------------------------------------|----------------------------------|---------------------------------|-------------------------------|-----------------------------|-----------------------------|---------------------|
| Sand (%)                                  | 90.72±0.72*                      | 94.26±1.04                      | 94.05±1.32                    | 92.93±1.77                  | 92.03±0.67                  | 11.09ns             |
| Silt (%)                                  | 5.88±0.36                        | 3.47±0.59                       | 3.90±1.00                     | 4.85±1.28                   | 4.98±0.38                   | 6.60ns              |
| Clay (%)                                  | 3.40±0.37                        | 2.27±0.46                       | 2.05±0.36                     | 2.23±0.50                   | 3.00±0.31                   | 4.82ns              |
| Porosity (%)                              | 43.68±0.88                       | 42.66±1.46                      | 38.85±2.21                    | 43.60±2.29                  | 40.85±1.02                  | 13.08ns             |
| WHC (%)                                   | 37.90±0.63                       | 38.34±0.77                      | 37.13±0.85                    | 37.08±1.24                  | 39.81±0.61                  | 8.33ns              |
| pH                                        | 9.21±0.06                        | 9.30±0.05                       | 9.45±0.09                     | 9.43±0.06                   | 9.18±0.04                   | 0.55ns              |
| EC (mS cm <sup>-1</sup> )                 | 3.22±0.32                        | 2.43±0.38                       | 0.75±0.95                     | 1.90±0.32                   | 1.35±0.13                   | 3.67ns              |
| CaCO <sub>3</sub> (%)                     | 4.95±0.23                        | 3.14±0.20                       | 9.09±1.59                     | 8.75±1.45                   | 3.85±0.15                   | 6.12ns              |
| Organic carbon (%)                        | 0.70±0.03                        | 0.60±0.03                       | 0.62±0.05                     | 0.68±0.05                   | 0.75±0.03                   | 0.37ns              |
| Cl <sup>-</sup> (%)                       | 0.29±0.03                        | 0.22±0.04                       | 0.07±0.01                     | 0.19±0.03                   | 0.12±0.01                   | 0.36ns              |
| SO <sub>4</sub> <sup>2-</sup> (%)         | 0.18±0.02                        | 0.15±0.02                       | 0.05±0.01                     | 0.11±0.02                   | 0.08±0.01                   | 0.22ns              |
| HCO <sub>3</sub> <sup>-</sup> (%)         | 0.20±0.02                        | 0.16±0.03                       | 0.05±0.01                     | 0.13±0.02                   | 0.09±0.01                   | 0.24ns              |
| Na <sup>+</sup> (mg 100g <sup>-1</sup> )  | 221.85±24.23                     | 166.95±26.74                    | 51.75±6.55                    | 128.23±21.57                | 90.42±8.85                  | 268.36ns            |
| K <sup>+</sup> (mg 100g <sup>-1</sup> )   | 34.54±3.89                       | 25.41±4.42                      | 9.07±1.23                     | 21.65±3.44                  | 15.16±1.50                  | 43.42ns             |
| Ca <sup>2+</sup> (mg 100g <sup>-1</sup> ) | 60.69±6.49                       | 46.94±7.65                      | 15.15±1.90                    | 39.23±6.35                  | 26.55±2.61                  | 74.26ns             |
| Mg <sup>2+</sup> (mg 100g <sup>-1</sup> ) | 21.71±2.16                       | 18.93±3.42                      | 7.02±0.90                     | 19.05±3.28                  | 11.43±1.15                  | 28.47ns             |

\*Mean values ± standard error. Different letter within each row means values with significant difference after Duncan's post hoc test ( $p < 0.05$ ). LSD<sub>0.05</sub>: least significant difference at probability level of 0.05. ns: non-significant, WHC: water holding capacity, and EC: electrical conductivity.
